# Supplementary material
Source: PubMed Central journal article supplement (PMC3732790)
Supplement: NIHMS473917-supplement-262_2013_1400_MOESM1_ESM.pdf [file NIHMS473917-supplement-262_2013_1400_MOESM1_ESM.pdf]

## Supplemental Figure 1

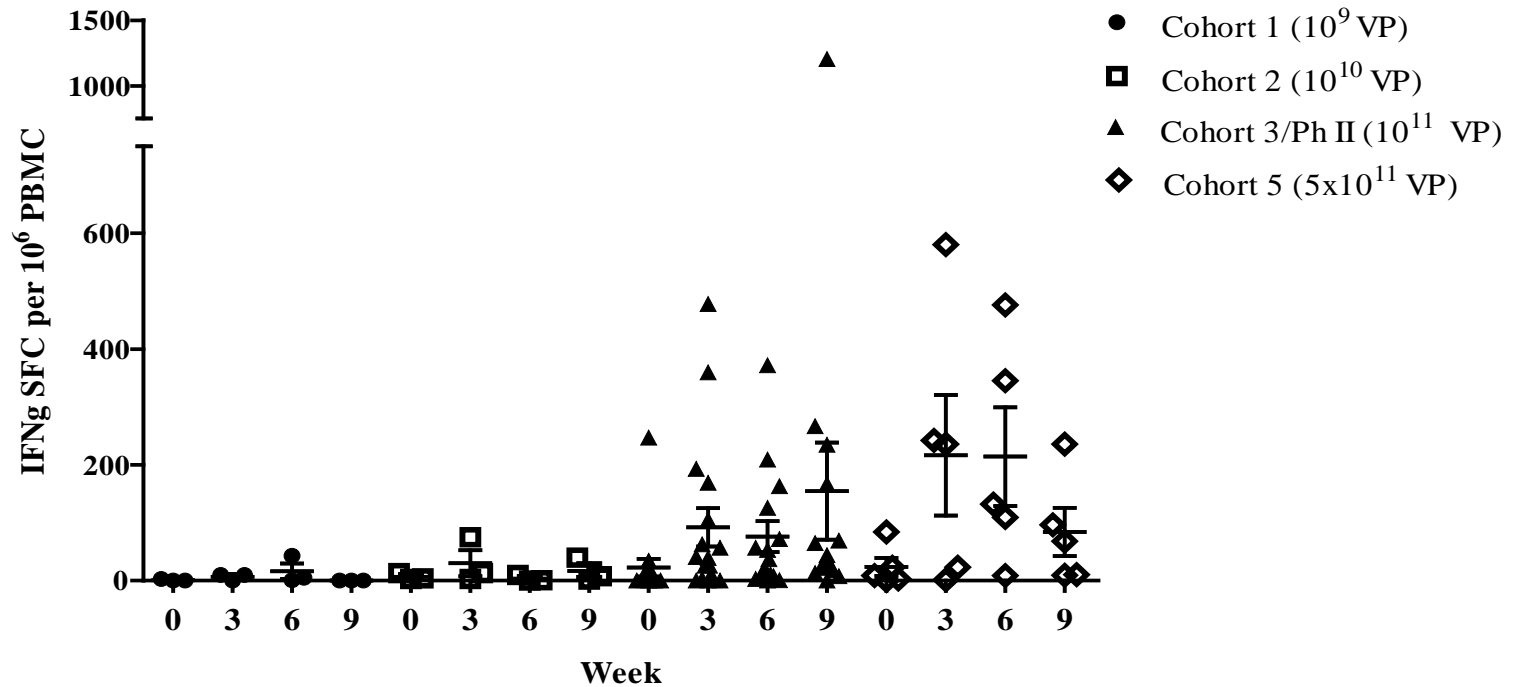

**Supplemental Figure 1. CEA directed CMI responses in treated patients.** CMI (IFN- $\gamma$  secretion) was assessed at baseline (week 0) and 3 weeks after the last immunotherapy (week 9) for patients in all 4-dose cohorts. A dose response was observed and the highest CMI level occurred in patients that received the highest dose. The CMI response with the highest dose was significantly elevated ( $P < 0.02$ ; *Mann-Whitney test*). Specificity of the responses was demonstrated by the lack of reactivity with the irrelevant antigens  $\beta$ -galactosidase and HIV-gag (data not shown). For positive controls, PBMCs were exposed to concanavalin A (data not shown). Horizontal line and error bar indicate the mean  $\pm$  SEM.

**Supplemental Table 1. Adverse Events**

| <b>Adverse Events</b>         | <b># Of Events</b> | <b>Unrelated/<br/>Unlikely</b> | <b>Possible</b> | <b>Probably/<br/>Definite</b> | <b>*Grade (G1,<br/>G2, or G3)</b> | <b>% Incidence<br/>(Based on 94<br/>treatments)</b> |
|-------------------------------|--------------------|--------------------------------|-----------------|-------------------------------|-----------------------------------|-----------------------------------------------------|
| Injection Site Reaction       | 21                 |                                |                 | 21                            | G1 (19); G2 (2)                   | 22.3                                                |
| Pain (all types)              | 17                 | 17                             |                 |                               | G1 (8); G2 (7);<br>G3 (2)         | 18.1                                                |
| Fever                         | 10                 | 4                              | 2               | 4                             | G1 (7); G2 (3)                    | 10.6                                                |
| Flu-like symptoms             | 10                 | 3                              | 5               | 2                             | G1 (9); G2 (1)                    | 10.6                                                |
| Fatigue                       | 8                  | 6                              | 2               |                               | G1 (5); G2 (2);<br>G3 (1)         | 8.5                                                 |
| Shortness of Breath           | 6                  | 6                              |                 |                               | G1 (3); G2 (3)                    | 6.4                                                 |
| Anorexia                      | 5                  | 4                              | 1               |                               | G1 (3); G2 (2)                    | 5.3                                                 |
| Chills                        | 5                  | 1                              | 1               | 3                             | G1 (5)                            | 5.3                                                 |
| Nausea                        | 5                  | 4                              | 1               |                               | G1 (5)                            | 5.3                                                 |
| Constipation                  | 5                  | 5                              |                 |                               | G1 (3); G2 (2)                    | 5.3                                                 |
| Edema                         | 5                  | 5                              |                 |                               | G1 (3); G2 (2)                    | 5.3                                                 |
| Vomiting                      | 4                  | 4                              |                 |                               | G1 (4)                            | 4.3                                                 |
| Hypertension                  | 3                  | 3                              |                 |                               | G1 (2); G2 (1)                    | 3.2                                                 |
| Anemia                        | 3                  | 3                              |                 |                               | G1 (1); G2 (1);<br>G3 (1)         | 3.2                                                 |
| Cough                         | 2                  | 2                              |                 |                               | G1 (2)                            | 2.1                                                 |
| Depression                    | 2                  | 2                              |                 |                               | G1 (2)                            | 2.1                                                 |
| Diarrhea                      | 2                  | 2                              |                 |                               | G1 (2)                            | 2.1                                                 |
| Headache                      | 2                  | 1                              | 1               |                               | G1 (2)                            | 2.1                                                 |
| Hypoalbuminemia               | 2                  | 2                              |                 |                               | G1 (1); G2 (1)                    | 2.1                                                 |
| Hypokalemia                   | 2                  | 2                              |                 |                               | G1 (1); G2 (1)                    | 2.1                                                 |
| Pleural Effusion              | 2                  | 2                              |                 |                               | G2 (1); G3 (1)                    | 2.1                                                 |
| Alkaline Phosphatase Increase | 2                  | 2                              |                 |                               | G1 (1); G3 (1)                    | 2.1                                                 |
| Myalgia                       | 2                  |                                | 2               |                               | G1 (2)                            | 2.1                                                 |
| Night Sweats                  | 2                  | 2                              |                 |                               | G1 (1); G2 (1)                    | 2.1                                                 |
| Sleep                         | 2                  | 2                              |                 |                               | G1 (2)                            | 2.1                                                 |
| Low Magnesium                 | 2                  | 2                              |                 |                               | G1 (2)                            | 2.1                                                 |
| Abdominal Bloating            | 1                  | 1                              |                 |                               | G1 (1)                            | 1.1                                                 |
| Abdominal Distention          | 1                  | 1                              |                 |                               | G3 (1)                            | 1.1                                                 |
| Abdominal Swelling            | 1                  | 1                              |                 |                               | G2 (1)                            | 1.1                                                 |
| Abdominal Wound               | 1                  | 1                              |                 |                               | G2 (1)                            | 1.1                                                 |

|                                  |                     |   |   |  |        |     |
|----------------------------------|---------------------|---|---|--|--------|-----|
| ALT Increase                     | 1                   | 1 |   |  | G1 (1) | 1.1 |
| AST Increase                     | 1                   | 1 |   |  | G2 (1) | 1.1 |
| Biliary Obstruction              | 1                   | 1 |   |  | G3 (1) | 1.1 |
| Bowl Obstruction                 | 1                   | 1 |   |  | G3 (1) | 1.1 |
| Cold                             | 1                   | 1 |   |  | G1 (1) | 1.1 |
| Dyspnea                          | 1                   | 1 |   |  | G3 (1) | 1.1 |
| Dysuria                          | 1                   | 1 |   |  | G1 (1) | 1.1 |
| Frequent Urination               | 1                   | 1 |   |  | G1 (1) | 1.1 |
| GI Disorder                      | 1                   | 1 |   |  | G3 (1) | 1.1 |
| Extra Pyramidal Movements        | 1                   | 1 |   |  | G1 (1) | 1.1 |
| Insomnia                         | 1                   | 1 |   |  | G1 (1) | 1.1 |
| Herpes Simplex                   | 1                   | 1 |   |  | G1 (1) | 1.1 |
| Hypotension                      | 1                   | 1 |   |  | G1 (1) | 1.1 |
| Loss of Appetite                 | 1                   | 1 |   |  | G1 (1) | 1.1 |
| Low White Blood Cells            | 1                   | 1 |   |  | G1 (1) | 1.1 |
| Numbness/Sensation in Fingertips | 1                   | 1 |   |  | G1 (1) | 1.1 |
| Onset of Menses                  | 1                   | 1 |   |  | G1 (1) | 1.1 |
| Poor Quality Sleep               | 1                   | 1 |   |  | G1 (1) | 1.1 |
| Presyncope                       | 1                   | 1 |   |  | G2 (1) | 1.1 |
| Pruritis                         | 1                   | 1 |   |  | G1 (1) | 1.1 |
| Rash-Right Lower Eye Lid         | 1                   | 1 |   |  | G1 (1) | 1.1 |
| Red/Swelling Right Upper Eyelid  | 1                   | 1 |   |  | G1 (1) | 1.1 |
| Renal Calculi                    | 1                   | 1 |   |  | G2 (1) | 1.1 |
| Runny Nose                       | 1                   |   | 1 |  | G1 (1) | 1.1 |
| Shallow Breathing                | 1                   | 1 |   |  | G1 (1) | 1.1 |
| Skin Rash                        | 1                   | 1 |   |  | G1 (1) | 1.1 |
| Vaginal Discharge                | 1                   | 1 |   |  | G1 (1) | 1.1 |
| Concentration                    | 1                   |   |   |  | G1 (1) | 1.1 |
| Weight Loss                      | 1                   | 1 |   |  | G2 (1) | 1.1 |
| Arthritis Joint Inflammation     | 1                   | 1 |   |  | G1 (1) | 1.1 |
| Flushing                         | 1                   |   | 1 |  | G1 (1) | 1.1 |
| Acute Renal Failure              | Disease progression |   |   |  | G3 (1) | 1.1 |

\* Parenthesis ( ) indicates numbers of events.

**Supplemental Table 2. Hematology, Chemistry, and ANA values**

| <b>Hematology Test</b>                   | <b>Week 0 value<br/>(Mean ± SEM)</b> | <b>Week 9 value<br/>(Mean ± SEM)</b> |
|------------------------------------------|--------------------------------------|--------------------------------------|
| Hgb (g/dL)                               | 13.09 ± 0.313                        | 12.48 ± 0.413                        |
| Hct (%)                                  | 39.63 ± 0.875                        | 37.92 ± 1.140                        |
| Plts (x10 <sup>9</sup> /L)               | 225.1 ± 20.76                        | 247.3 ± 23.57                        |
| WBC (x10 <sup>3</sup> /mm <sup>3</sup> ) | 6.81 ± 0.532                         | 8.21 ± 0.741                         |
| Neutrophils (%)                          | 64.46 ± 2.068                        | 67.28 ± 3.268                        |
| Lymphocytes (%)                          | 23.23 ± 1.874                        | 18.34 ± 2.071                        |
| Monocytes (%)                            | 8.86 ± 0.462                         | 7.68 ± 0.569                         |
| Eosinophils (%)                          | 3.97 ± 0.677                         | 3.16 ± 0.685                         |
| Basophils (%)                            | 0.52 ± 0.056                         | 0.38 ± 0.048                         |
|                                          |                                      |                                      |
| <b>Chemistry Test</b>                    | <b>Week 0 value<br/>(Mean ± SEM)</b> | <b>Week 9 value<br/>(Mean ± SEM)</b> |
| Na (mEq/L)                               | 139.2 ± 0.424                        | 137.9 ± 0.718                        |
| K (mEq/L)                                | 3.90 ± 0.085                         | 3.80 ± 0.073                         |
| Cl (mEq/L)                               | 105.0 ± 0.561                        | 103.3 ± 1.061                        |
| CO <sub>2</sub> (mEq/L)                  | 27.8 ± 0.374                         | 27.63 ± 0.458                        |
| BUN (mg/dL)                              | 17.0 ± 1.136                         | 17.1 ± 1.611                         |
| Creatinine (mg/dL)                       | 0.81 ± 0.046                         | 0.86 ± 0.054                         |
| Glucose (mg/dL)                          | 121.8 ± 7.458                        | 123.5 ± 7.885                        |
| Ca (mg/dL)                               | 8.84 ± 0.075                         | 8.87 ± 0.073                         |
| Total protein (g/dL)                     | 6.95 ± 0.078                         | 6.67 ± 0.100                         |
| Albumin (g/dL)                           | 3.78 ± 0.085                         | 3.62 ± 0.113                         |
| AST (U/L)                                | 31.71 ± 3.846                        | 31.88 ± 3.506                        |
| ALT (U/L)                                | 27.83 ± 4.228                        | 25.67 ± 3.414                        |
| Alkaline phosphatase (U/L)               | 107.0 ± 13.30                        | 124.0 ± 17.40                        |
| Bilirubin (mg/dL)                        | 0.78 ± 0.071                         | 0.75 ± 0.079                         |
|                                          |                                      |                                      |
| <b>*ANA Test</b>                         | <b>Week 0 value<br/>(Mean ± SEM)</b> | <b>Week 9 value<br/>(Mean ± SEM)</b> |
| Titer                                    | 103.3 ± 51.04                        | 123.3 ± 50.56                        |

\*Values represent inverse of the titer and are from patients with positive values.
